# Supplementary material for: Miniaturized VIS‐NIR Spectrometers Based on Narrowband and Tunable Transmission Cavity Organic Photodetectors with Ultrahigh Specific Detectivity above 1014 Jones
Source: PubMed Central journal article supplement — Adv Mater. 2021 Sep 13;33(44):2102967. doi: 10.1002/adma.202102967 (PMC11469248; doi:10.1002/adma.202102967), 2021-09-13
Supplement: ADMA-33-2102967-s001.pdf [file ADMA-33-2102967-s001.pdf]

# ADVANCED MATERIALS

## Supporting Information

for *Adv. Mater.*, DOI: 10.1002/adma.202102967

Miniaturized VIS-NIR Spectrometers Based on  
Narrowband and Tunable Transmission Cavity Organic  
Photodetectors with Ultrahigh Specific Detectivity above  
 $10^{14}$  Jones

*Shen Xing,\* Vasileios Christos Nikolis, Jonas Kublitski,  
Erjuan Guo, Xiangkun Jia, Yazhong Wang, Donato  
Spoltore, Koen Vandewal, Hans Kleemann, Johannes  
Benduhn,\* and Karl Leo\**

1 Supporting Information

2 **Miniaturized VIS-NIR Spectrometers based on Narrowband and Tunable Transmission**

3 **Cavity Organic Photodetectors with Ultrahigh Specific Detectivity above  $10^{14}$  Jones**

4 *Shen Xing\**, *Vasileios Christos Nikolis*, *Jonas Kublitski*, *Erjuan Guo*, *Xiangkun Jia*, *Yazhong Wang*,

5 *Donato Spoltore*, *Koen Vandewal*, *Hans Kleemann*, *Johannes Benduhn\** and *Karl Leo\**

## 6 Supporting Figures

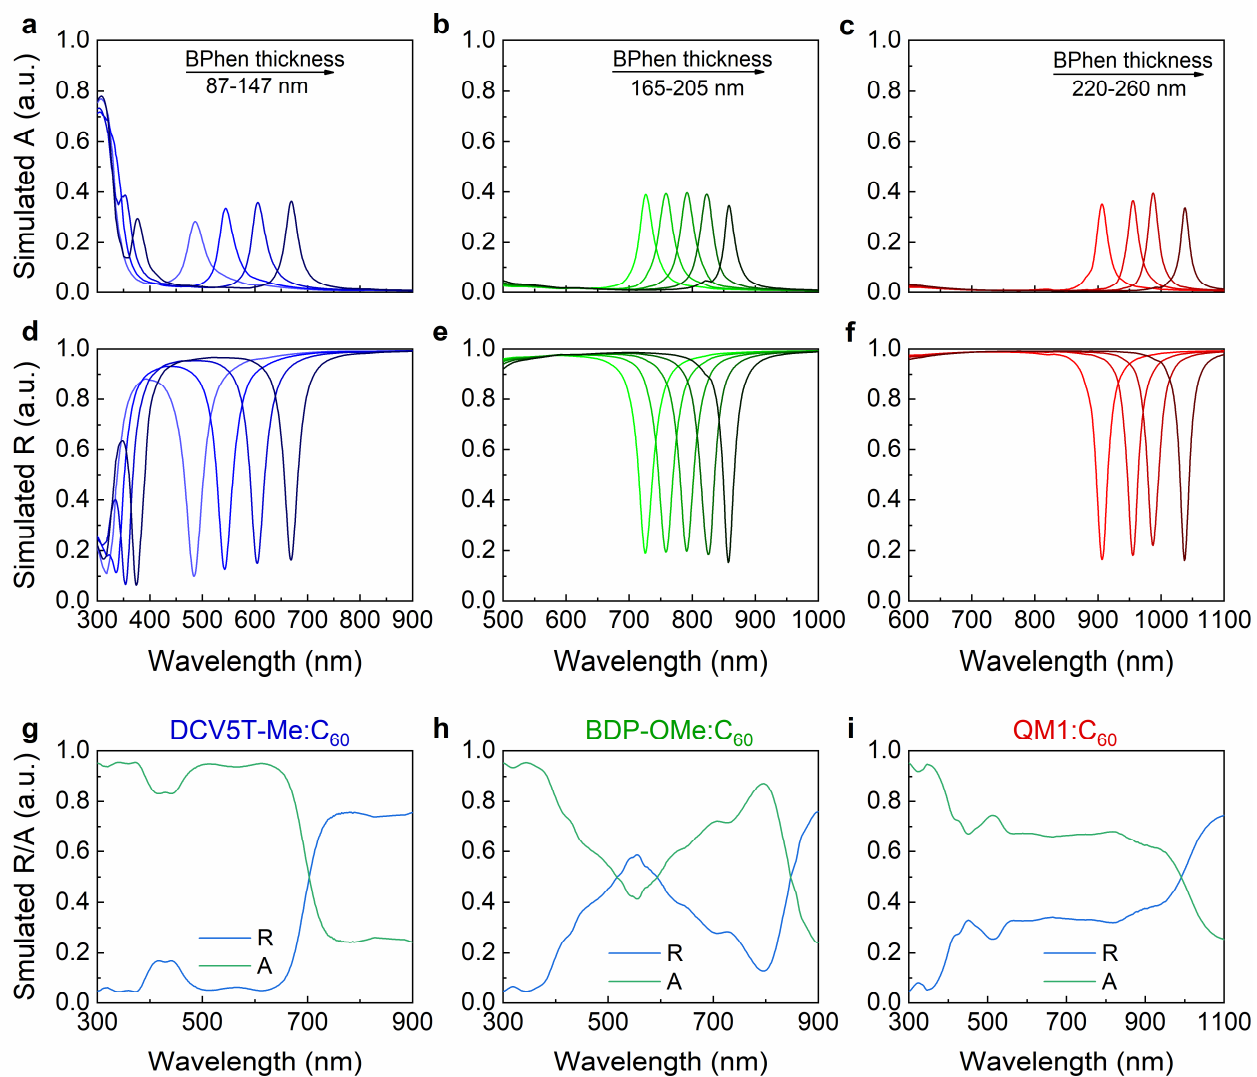

7  
 8 **Figure S1. Simulated absorption (A) and reflection (R) spectra of TCs and OPDs.** Simulated  
 9 A and R spectra of (a-f) TCs and (g-i) OPDs based on different active blends as labeled above each  
 10 subfigure.

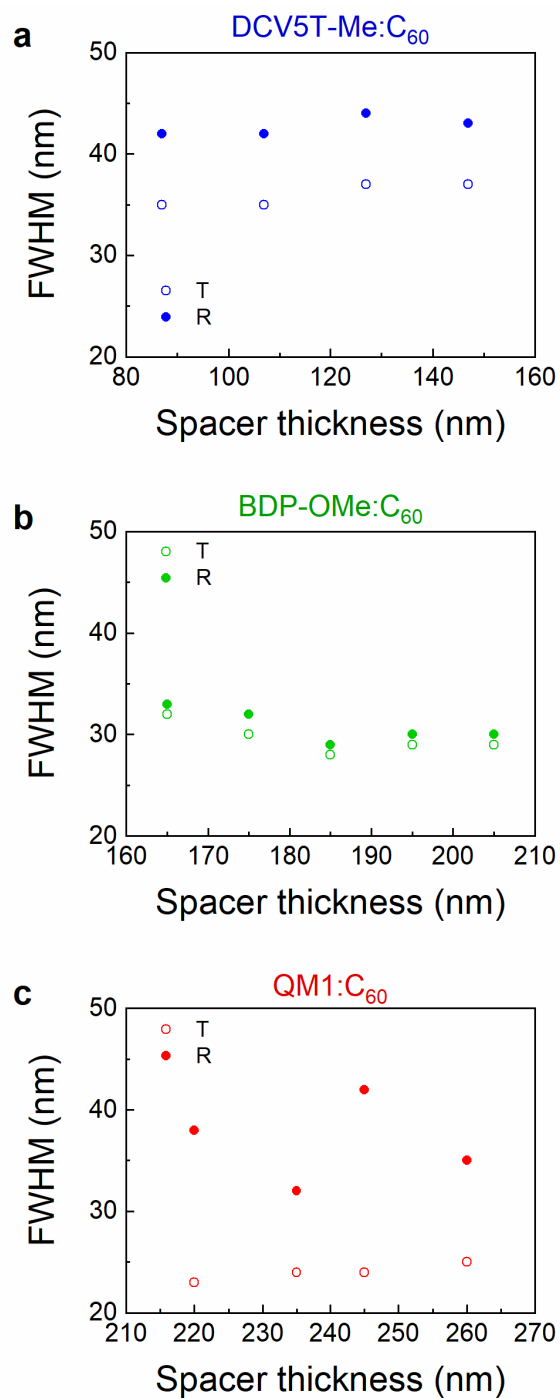

11  
12 **Figure S2. Spectral resolution of TC-OPDs.** Comparison of the FWHM of the responsivity peak  
13 (*R*) of TC-OPDs and transmission (*T*) of TC based on different active blends (a) DCV5T-Me:C<sub>60</sub>,  
14 (b) BDP-OMe:C<sub>60</sub>, and (c) QM1:C<sub>60</sub>, respectively. All devices show a narrow FWHM down to  
15 ~40 nm.

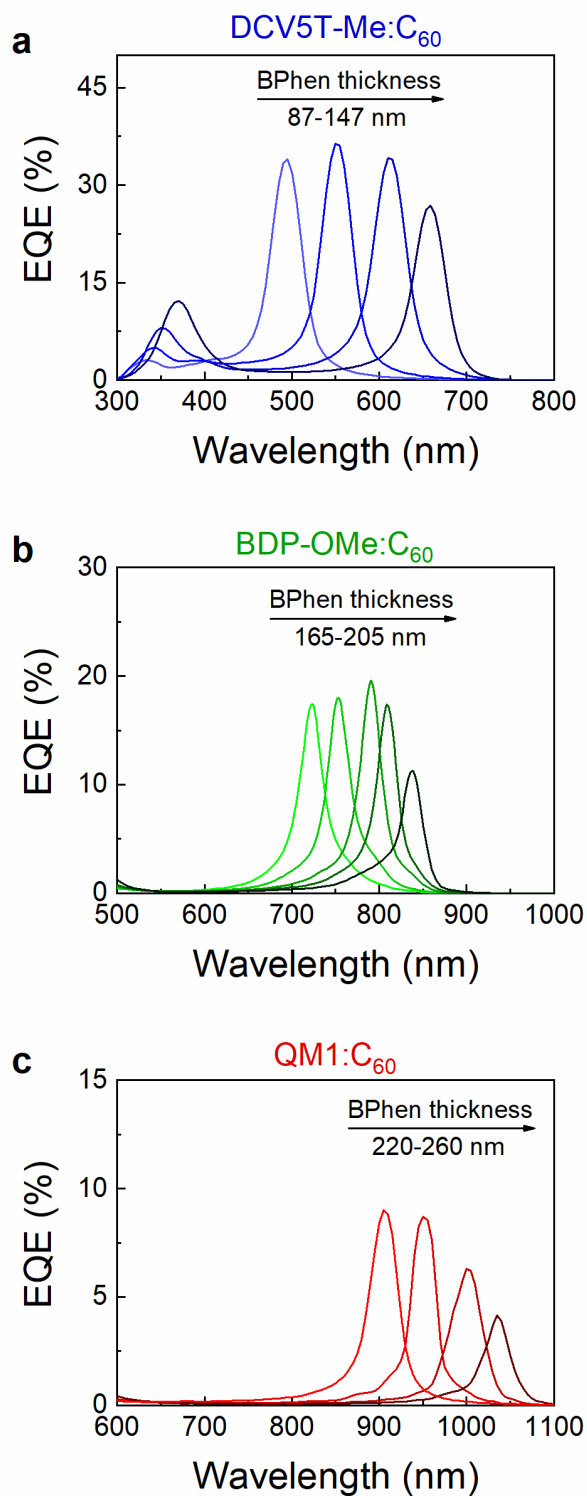

16  
17 **Figure S3. EQE spectra of TC-OPDs.** EQE spectra of TC-OPDs for varied spacer (BPhen) layer  
18 thicknesses at zero bias based on different active blends (a) DCV5T-Me:C<sub>60</sub>, (b) BDP-OMe:C<sub>60</sub>,  
19 and (c) QM1:C<sub>60</sub>, respectively.

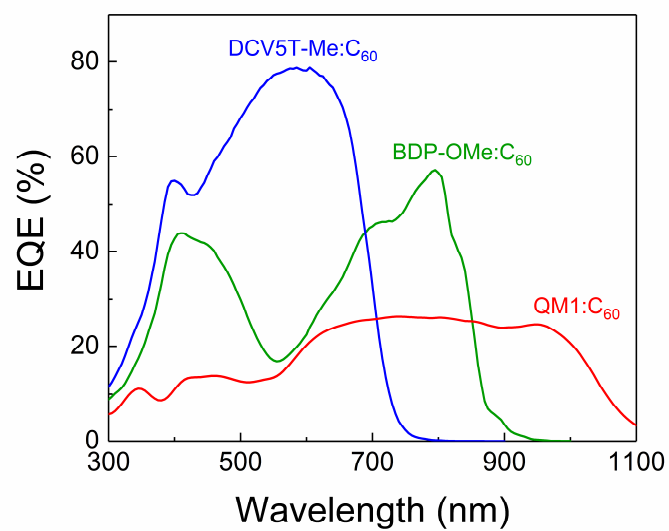

20

21

**Figure S4. EQE spectra of the three OPDs without TC structure.**

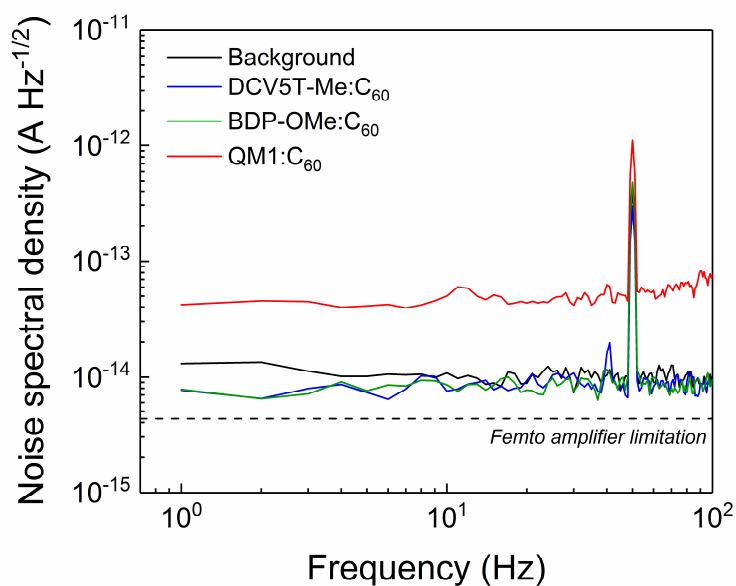

22  
23 **Figure S5. Noise spectral density of TC-OPDs.** The spectra are calculated from Welch's method  
24 of the time-dependent dark current at zero bias of TC-OPDs based on different active blends. The  
25 current Femto preamplifier we use sets a limitation of  $4.3 \text{ fA Hz}^{-1/2}$  as specified with the black  
26 dashed line. Our setup limitation is around  $9 \text{ fA Hz}^{-1/2}$ , being significantly larger than the thermal  
27 noise spectral density of TC-OPDs based on active blends DCV5T-Me:C<sub>60</sub> and BDP-OMe:C<sub>60</sub>. For  
28 these devices, the measured background noise of our setup overlaps with the measured signal,  
29 indicating that the real noise level is beyond the sensitivity of our setup.

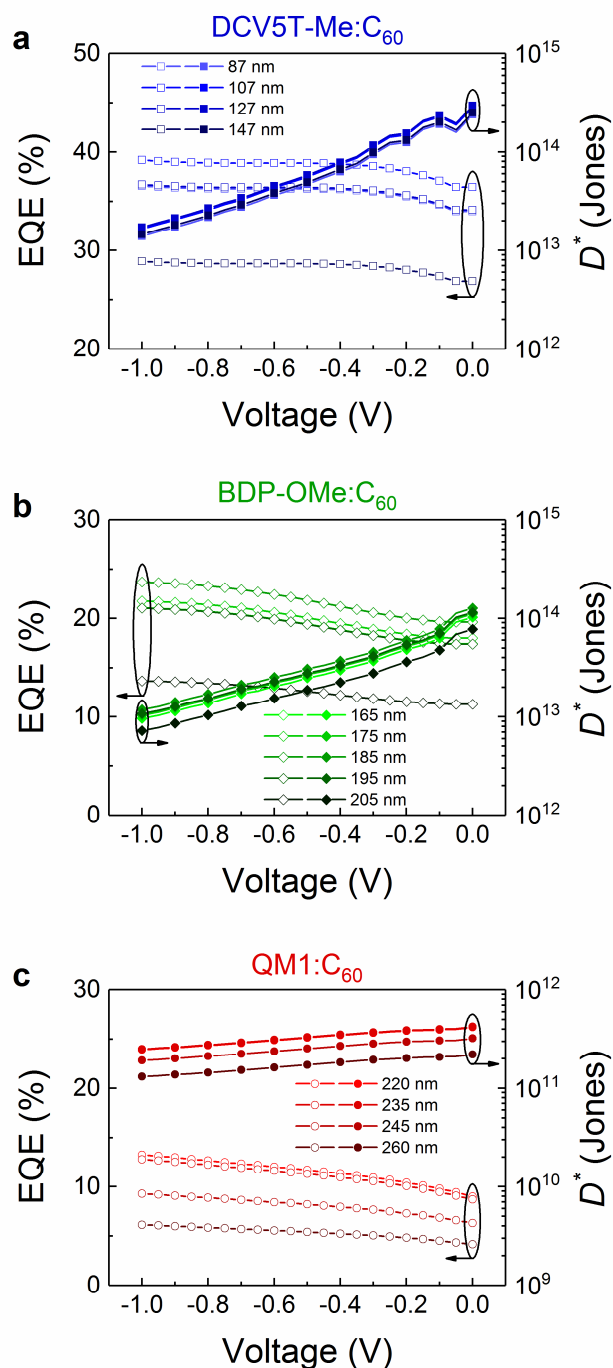

30  
 31 **Figure S6. EQE and  $D^*$  of TC-OPDs at peak wavelength as a function of applied voltage.** EQE  
 32 and  $D^*$  of TC-OPDs with varied spacer (BPhen) layer thicknesses as a function of applied reverse  
 33 bias based on different active blends (a) DCV5T-Me:C<sub>60</sub>, (b) BDP-OMe:C<sub>60</sub>, and (c) QM1:C<sub>60</sub>.  
 34 The specific detectivities in (a) and (b) are obtained from the calculated sum of thermal and shot  
 35 noise spectral density ( $S_n = S_{\text{thermal}} + S_{\text{shot}} = (4k_B T / R_{\text{sh}} + 2qI_d)^{1/2}$ ). The  $D^*$  in (c) is acquired from the sum  
 36 of measured thermal noise and calculated shot noise spectral density. Here,  $q$  is the elementary  
 37 charge, and  $I_d$  represents the dark current at a reverse bias voltage.



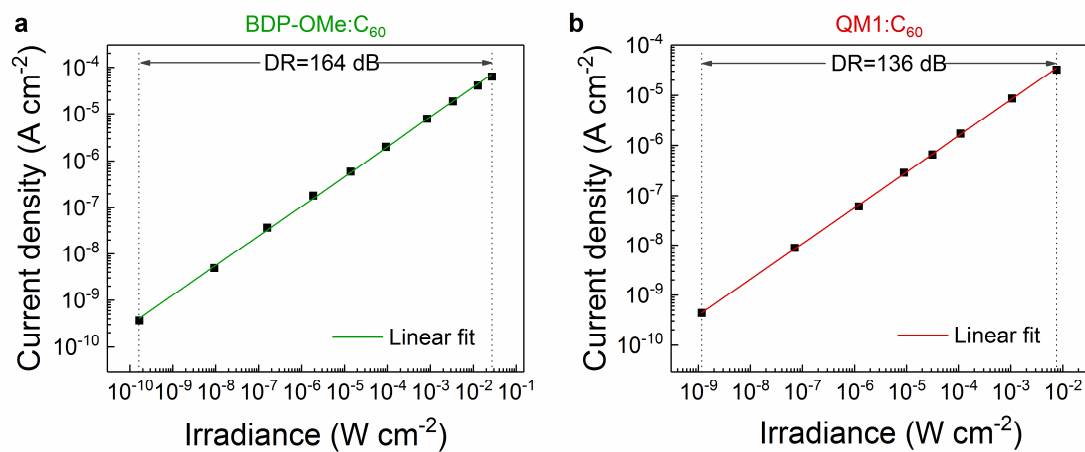

38  
39 **Figure S7. DR of TC-OPDs.** Photoresponse of TC-OPDs for varying light intensity measured at  
40 zero bias based on active blends (a) BDP-OMe:C<sub>60</sub> and (b) QM1:C<sub>60</sub>.

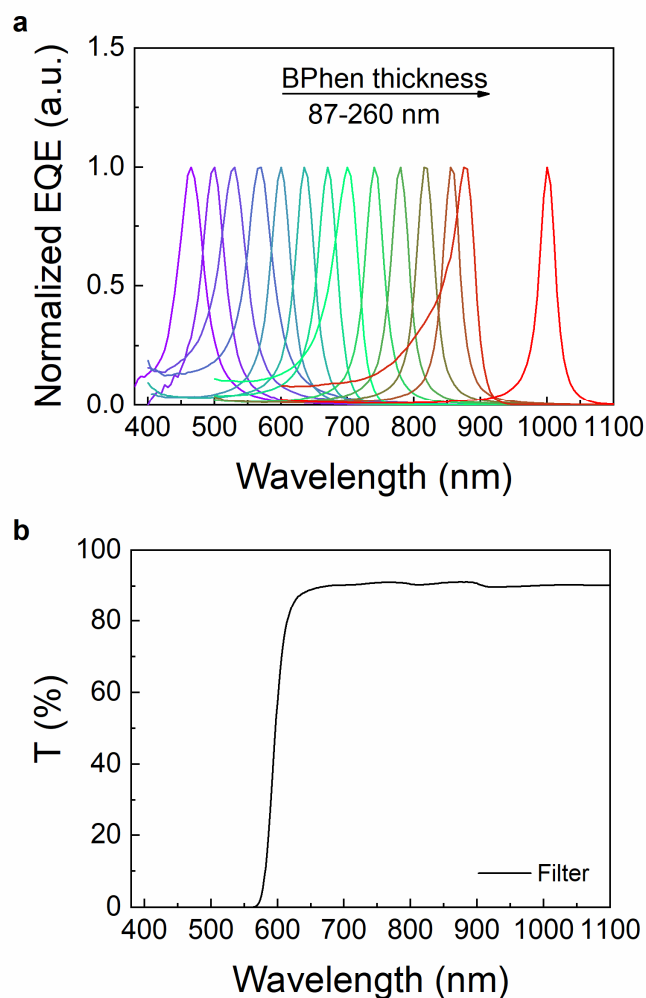

41  
 42 **Figure S8. The EQE spectra of photodetecting pixels in a miniaturized spectrometer and**  
 43 **longpass filter transmission.** **a** Normalized EQE spectra of photodetecting pixels in a miniaturized  
 44 spectrometer at zero bias with varied spacer (BPhen) layer thicknesses. The photoresponse peak is  
 45 finely tuned from 465 to 1000 nm. **b** Transmission spectrum of the longpass filter. During the  
 46 transmission measurement of the semi-transparent solar cell, short wavelengths (< 575 nm) are  
 47 used to block the influence of the second resonance peak of BDP-OMe-based and QM1 based-  
 48 TC-OPDs. The layer configuration of the semi-transparent solar cell is ITO (90 nm) /  
 49 MH250:W<sub>2</sub>(hpp)<sub>4</sub> (7 wt%, 5 nm) / C<sub>70</sub> (15 nm) / BDP-OMe:C<sub>60</sub> (1:2 substrate temperature at 100 °C  
 50 during film deposition, 40 nm) / BF-DPB (5 nm) / BPAPF:NDP9 (10 wt%, 40 nm) / NDP9 (1 nm)  
 51 / MoO<sub>3</sub> (3 nm) / Au (1 nm) / Ag (7 nm).

## 52 Supporting Tables

53 **Table S1. Device stacks of all investigated TC-OPDs.** For the devices, the following materials  
 54 are used: the electrode materials: ITO (Thin Film Devices, USA) and Al (Kurt J. Lesker), the donor  
 55 materials: DCV5T-Me (Synthon, Germany), BDP-OMe (TU Dresden, Germany), and QM1 (TU  
 56 Dresden, Germany), the acceptor material: C<sub>60</sub> (Lumtec, Taiwan), the transport layer materials:  
 57 BPAPF (Lumtec, Taiwan), BF-DPB (Synthon, Germany) and HATNA-Cl<sub>6</sub> (Lumtec, Taiwan), the  
 58 dopants: F<sub>6</sub>-TCNNQ (Novaled GmbH, Germany) and W<sub>2</sub>(hpp)<sub>4</sub> (Novaled GmbH, Germany), the  
 59 spacer material: BPhen (Lumtec, Taiwan), the seed layer materials: MoO<sub>3</sub> (Sigma-Aldrich, USA)  
 60 and Au (Allgemeine Gold und Silberscheidanstalt, Germany) and the mirror material: Ag (Kurt J.  
 61 Lesker).

| Active blend             | Stack                                                                                                                                                                                                                                                                                                                                                                                                       |
|--------------------------|-------------------------------------------------------------------------------------------------------------------------------------------------------------------------------------------------------------------------------------------------------------------------------------------------------------------------------------------------------------------------------------------------------------|
| DCV5T-Me:C <sub>60</sub> | Ag (30 nm) / BPhen (varied thicknesses) / Ag (30 nm) / Au (1 nm) / MoO <sub>3</sub> (3 nm) / Glass (1 mm) / ITO (90 nm) / BPAPF:F <sub>6</sub> -TCNNQ (3 wt%, 40 nm) / BPAPF (5 nm) / DCV5T-Me:C <sub>60</sub> (2:1, 40 nm) / C <sub>60</sub> (15 nm) / HATNA-Cl <sub>6</sub> (10 nm) / HATNA-Cl <sub>6</sub> :W <sub>2</sub> (hpp) <sub>4</sub> (3 wt%, 10 nm) / Al (100 nm)                               |
| BDP-OMe:C <sub>60</sub>  | Ag (30 nm) / BPhen (varied thicknesses) / Ag (30 nm) / Au (1 nm) / MoO <sub>3</sub> (3 nm) / Glass (1 mm) / ITO (90 nm) / BPAPF:F <sub>6</sub> -TCNNQ (3 wt%, 40 nm) / BPAPF (5 nm) / BDP-OMe:C <sub>60</sub> (1:2 substrate temperature at 90 °C, 50 nm) / C <sub>60</sub> (15 nm) / HATNA-Cl <sub>6</sub> (10 nm) / HATNA-Cl <sub>6</sub> :W <sub>2</sub> (hpp) <sub>4</sub> (3 wt%, 10 nm) / Al (100 nm) |
| QM1:C <sub>60</sub>      | Ag (30 nm) / BPhen (varied thicknesses) / Ag (30 nm) / Au (1 nm) / MoO <sub>3</sub> (3 nm) / Glass (1 mm) / ITO (90 nm) / BF-DPB:F <sub>6</sub> -TCNNQ (5 wt%, 25 nm) / BF-DPB (5 nm) / QM1:C <sub>60</sub> (1:2, 50 nm) / C <sub>60</sub> (15 nm) / HATNA-Cl <sub>6</sub> (10 nm) / HATNA-Cl <sub>6</sub> :W <sub>2</sub> (hpp) <sub>4</sub> (3 wt%, 10 nm) / Al (100 nm)                                  |

62 **Table S2. Key parameters of TC-OPDs.** Response peak, responsivity ( $R$ ), on-off ratio at 100 mW  
 63  $\text{cm}^{-2}$  illumination, specific detectivity ( $D^*$ ), shunt resistance ( $R_{\text{sh}}$ ), and noise current at zero bias.

| Active blend             | Response peak (nm) | $R$ ( $\text{A W}^{-1}$ ) | On-off ratio ( $\times 10^8$ ) | $D^*$ ( $\times 10^{14}$ Jones) | $R_{\text{sh}}$ ( $\times 10^9 \Omega$ ) | Noise current ( $\text{fA Hz}^{-1/2}$ ) |
|--------------------------|--------------------|---------------------------|--------------------------------|---------------------------------|------------------------------------------|-----------------------------------------|
| DCV5T-Me:C <sub>60</sub> | 495                | 0.14                      | 4.9                            | 2.4                             | 777                                      | 0.14                                    |
|                          | 550                | 0.16                      | 6.0                            | 2.8                             |                                          |                                         |
|                          | 615                | 0.17                      | 6.6                            | 3.0                             |                                          |                                         |
|                          | 660                | 0.14                      | 5.6                            | 2.5                             |                                          |                                         |

| Active blend            | Response peak (nm) | $R$ ( $\text{A W}^{-1}$ ) | On-off ratio ( $\times 10^8$ ) | $D^*$ ( $\times 10^{14}$ Jones) | $R_{\text{sh}}$ ( $\times 10^9 \Omega$ ) | Noise current ( $\text{fA Hz}^{-1/2}$ ) |
|-------------------------|--------------------|---------------------------|--------------------------------|---------------------------------|------------------------------------------|-----------------------------------------|
| BDP-OMe:C <sub>60</sub> | 724                | 0.10                      | 3.2                            | 1.0                             | 258                                      | 0.25                                    |
|                         | 754                | 0.11                      | 3.4                            | 1.1                             |                                          |                                         |
|                         | 790                | 0.12                      | 3.6                            | 1.3                             |                                          |                                         |
|                         | 810                | 0.11                      | 3.4                            | 1.1                             |                                          |                                         |
|                         | 840                | 0.08                      | 3.0                            | 0.8                             |                                          |                                         |

| Active blend        | Response peak (nm) | $R$ ( $\text{A W}^{-1}$ ) | On-off ratio ( $\times 10^7$ ) | $D^*$ ( $\times 10^{11}$ Jones) | $R_{\text{sh}}$ ( $\times 10^6 \Omega$ ) | Noise current ( $\text{fA Hz}^{-1/2}$ ) |
|---------------------|--------------------|---------------------------|--------------------------------|---------------------------------|------------------------------------------|-----------------------------------------|
| QM1:C <sub>60</sub> | 905                | 0.07                      | 3.9                            | 4.2                             | 30                                       | 40                                      |
|                     | 950                | 0.07                      | 2.9                            | 4.2                             |                                          |                                         |
|                     | 1000               | 0.05                      | 2.9                            | 3.2                             |                                          |                                         |
|                     | 1035               | 0.03                      | 2.6                            | 2.2                             |                                          |                                         |

64 **Table S3. Summary of previously reported photodetectors.** Detailed information of previously  
 65 reported organic, inorganic, and perovskite photodetectors shown in Figure 4d.

| Broadband | Active material                                                                                    | Wavelength range (nm) | $D^*$ (Jones)                                                                             | Bias (V) | Comment                          | Ref. |
|-----------|----------------------------------------------------------------------------------------------------|-----------------------|-------------------------------------------------------------------------------------------|----------|----------------------------------|------|
|           | PBDTTT-EFT:<br>eh-IDTBR                                                                            | 400-800               | $1.6 \times 10^{13}$ @720 nm                                                              | -1.0     | Non-Fullerene                    | [1]  |
|           | PBDTTT-C-T:<br>FOIC                                                                                | 300-1000              | $2.0 \times 10^{13}$ @820 nm                                                              | -1.0     | Non-Fullerene/<br>Thick junction | [2]  |
|           | ClAlPc:C <sub>70</sub>                                                                             | 300-800               | $4.0 \times 10^{13}$ @730 nm                                                              | 0.0      | Small molecule                   | [3]  |
|           | PTB7-Th:<br>CO <sub>2</sub> 8DFIC:<br>PC <sub>71</sub> BM                                          | 400-1000              | $8.0 \times 10^{11}$ @670 nm                                                              | 0.0      | Non-Fullerene/<br>Ternary        | [4]  |
|           | PTB7-Th:<br>IFIC-i-4F:<br>PC <sub>71</sub> BM                                                      | 300-1000              | $1.0 \times 10^{14}$ @600 nm                                                              | 0.0      | Ternary                          | [5]  |
|           | PBDTTBTQ:<br>PC <sub>60</sub> BM                                                                   | 300-1100              | $3.0 \times 10^{11}$ @1000 nm                                                             | -1.0     |                                  | [6]  |
|           | PBDB-T:<br>PNDI-FT10                                                                               | 400-800               | $2.0 \times 10^{12}$ @600 nm                                                              | -3.0     | All polymer                      | [7]  |
|           | Organic:PbS                                                                                        | 400-1000              | $1.1 \times 10^{13}$ @650 nm                                                              | 40.0     | Bilayer                          | [8]  |
|           | PBT:PC <sub>61</sub> BM<br>PBTt:PC <sub>61</sub> BM                                                | 300-1600              | $7.7 \times 10^{10}$ @900 nm<br>$2.5 \times 10^{11}$ @900 nm                              | -0.1     |                                  | [9]  |
|           | PbS:Perovskite                                                                                     | 400-800               | $2.1 \times 10^{13}$ @500 nm                                                              | -1.0     | PM                               | [10] |
|           | 1-BF <sub>4</sub> :C <sub>60</sub><br>1-TPFB:C <sub>60</sub><br>2-BF <sub>4</sub> :C <sub>60</sub> | 400-1600              | $3.7 \times 10^9$ @1000 nm<br>$5.3 \times 10^{10}$ @1000 nm<br>$7.0 \times 10^9$ @1000 nm | 0.0      | Heptamethine Salts               | [11] |
|           | Perovskite                                                                                         | 300-800               | $2.7 \times 10^{12}$ @650 nm                                                              | 0.0      |                                  | [12] |

| Narrowband | Active material               | Wavelength range (nm) | $D^*$ (Jones)                                                                                                                                                                                                                                                                                                                                                                                                                                                                                                                                                                                                                                               | Bias (V)   | Comment                          | Ref. |
|------------|-------------------------------|-----------------------|-------------------------------------------------------------------------------------------------------------------------------------------------------------------------------------------------------------------------------------------------------------------------------------------------------------------------------------------------------------------------------------------------------------------------------------------------------------------------------------------------------------------------------------------------------------------------------------------------------------------------------------------------------------|------------|----------------------------------|------|
|            | P3HT:NT812:Y6                 | 860                   | $1.2 \times 10^{13}$ @860 nm                                                                                                                                                                                                                                                                                                                                                                                                                                                                                                                                                                                                                                | -0.1       | EDN                              | [13] |
|            | P3HT:PTB7:PC <sub>71</sub> BM | 745                   | $1.1 \times 10^{12}$ @745 nm                                                                                                                                                                                                                                                                                                                                                                                                                                                                                                                                                                                                                                | 0.0        |                                  | [14] |
|            | DCV5T-Me:C <sub>60</sub>      | 400-700               | $1.8 \times 10^{12}$ @590 nm                                                                                                                                                                                                                                                                                                                                                                                                                                                                                                                                                                                                                                | 0.0        | CT absorption/<br>Small molecule | [15] |
|            | PBTTT:PC <sub>61</sub> BM     | 700-1700              | $5.0 \times 10^{12}$ @800 nm<br>$1.0 \times 10^{13}$ @960 nm                                                                                                                                                                                                                                                                                                                                                                                                                                                                                                                                                                                                | 0.0        | CT absorption<br>/Polymer        | [16] |
|            | ZnPc:C <sub>60</sub>          | 810-1550              | $1.0 \times 10^{11}$<br>(upper limit)                                                                                                                                                                                                                                                                                                                                                                                                                                                                                                                                                                                                                       | 0.0        | CT absorption/<br>Small molecule | [17] |
|            | P3HT:PC <sub>71</sub> BM      | 650                   | $1.3 \times 10^{11}$ @650 nm                                                                                                                                                                                                                                                                                                                                                                                                                                                                                                                                                                                                                                | -10.0      | PM                               | [18] |
|            | PCDTBT:PC <sub>70</sub> BM    | 680                   | $1.7 \times 10^{12}$ @680 nm                                                                                                                                                                                                                                                                                                                                                                                                                                                                                                                                                                                                                                | -1.0       | CCN                              | [19] |
|            | Perovskite                    | 650                   | $1.9 \times 10^{11}$ @650 nm                                                                                                                                                                                                                                                                                                                                                                                                                                                                                                                                                                                                                                | -0.5       | CCN                              | [20] |
|            | <b>This work</b>              | <b>400-1100</b>       | <b><math>2.4 \times 10^{14}</math>@495 nm</b><br><b><math>2.8 \times 10^{14}</math>@550 nm</b><br><b><math>3.0 \times 10^{14}</math>@615 nm</b><br><b><math>2.5 \times 10^{14}</math>@660 nm</b><br><b><math>1.0 \times 10^{14}</math>@724 nm</b><br><b><math>1.1 \times 10^{14}</math>@754 nm</b><br><b><math>1.3 \times 10^{14}</math>@790 nm</b><br><b><math>1.1 \times 10^{14}</math>@810 nm</b><br><b><math>7.7 \times 10^{13}</math>@840 nm</b><br><b><math>4.2 \times 10^{11}</math>@905 nm</b><br><b><math>4.2 \times 10^{11}</math>@950 nm</b><br><b><math>3.2 \times 10^{11}</math>@1000 nm</b><br><b><math>2.2 \times 10^{11}</math>@1035 nm</b> | <b>0.0</b> | <b>Transmission cavity</b>       |      |

## 66 Supporting References

- 67 [1] W. Jang, S. Rasool, B. G. Kim, J. Kim, J. Yoon, S. Manzhos, H. K. Lee, I. Jeon, D. H. Wang,  
68 *Adv. Funct. Mater.* **2020**, 30, 2001402.
- 69 [2] G. H. Liu, T. F. Li, X. W. Zhan, H. B. Wu, Y. Cao, *ACS Appl. Mater. Interfaces* **2020**, 12,  
70 17781.
- 71 [3] C. C. Lee, R. Estrada, Y. Z. Li, S. Biring, N. R. A. Al Amin, M. Z. Li, S. W. Liu, K. T. Wong,  
72 *Adv. Opt. Mater.* **2020**, 8, 2000519.
- 73 [4] W. Li, Y. L. Xu, X. Y. Meng, Z. Xiao, R. M. Li, L. Jiang, L. H. Cui, M. J. Zheng, C. Liu, L.  
74 M. Ding, Q. Q. Lin, *Adv. Funct. Mater.* **2019**, 29, 1808948.
- 75 [5] Z.-X. Liu, T.-K. Lau, G. Zhou, S. Li, J. Ren, S. K. Das, R. Xia, G. Wu, H. Zhu, X. Lu, *Nano*  
76 *Energy* **2019**, 63, 103807.
- 77 [6] V. Yeddu, G. Seo, F. Cruciani, P. M. Beaujuge, D. Y. Kim, *ACS Photonics* **2019**, 6, 2368.
- 78 [7] X. F. Xu, X. B. Zhou, K. Zhou, Y. X. Xia, W. Ma, O. Inganas, *Adv. Funct. Mater.* **2018**, 28,  
79 1805570.
- 80 [8] Y. Z. Wei, Z. W. Ren, A. D. Zhang, P. Mao, H. Li, X. H. Zhong, W. W. Li, S. Y. Yang, J. Z.  
81 Wang, *Adv. Funct. Mater.* **2018**, 28, 1706690.
- 82 [9] J. Han, J. Qi, X. Zheng, Y. Wang, L. Hu, C. Guo, Y. Wang, Y. Li, D. Ma, W. Qiao, *J. Mater.*  
83 *Chem. C* **2017**, 5, 159.
- 84 [10] C. Liu, H. Peng, K. Wang, C. Wei, Z. Wang, X. Gong, *Nano Energy* **2016**, 30, 27.
- 85 [11] M. Young, J. Suddard-Bangsund, T. J. Patrick, N. Pajares, C. J. Traverse, M. C. Barr, S. Y.  
86 Lunt, R. R. Lunt, *Adv. Opt. Mater.* **2016**, 4, 1028.
- 87 [12] Q. Lin, A. Armin, D. M. Lyons, P. L. Burn, P. Meredith, *Adv. Mater.* **2015**, 27, 2060.
- 88 [13] B. Xie, R. Xie, K. Zhang, Q. Yin, Z. Hu, G. Yu, F. Huang, Y. Cao, *Nat. Commun.* **2020**, 11,  
89 1.
- 90 [14] S. Xing, X. Wang, E. Guo, H. Kleemann, K. Leo, *ACS Appl. Mater. Interfaces* **2020**, 12,  
91 13061.
- 92 [15] J. Wang, S. Ullbrich, J.-L. Hou, D. Spoltore, Q. Wang, Z. Ma, Z. Tang, K. Vandewal, *ACS*

- 93        *Photonics* **2019**, 6, 1393.
- 94    [16] Z. Tang, Z. Ma, A. Sanchez-Diaz, S. Ullbrich, Y. Liu, B. Siegmund, A. Mischok, K. Leo, M.  
95        Campoy-Quiles, W. Li, K. Vandewal, *Adv. Mater.* **2017**, 29, 1702184.
- 96    [17] B. Siegmund, A. Mischok, J. Benduhn, O. Zeika, S. Ullbrich, F. Nehm, M. Bohm, D. Spoltore,  
97        H. Frob, C. Korner, K. Leo, K. Vandewal, *Nat. Commun.* **2017**, 8, 15421.
- 98    [18] W. Wang, F. Zhang, M. Du, L. Li, M. Zhang, K. Wang, Y. Wang, B. Hu, Y. Fang, J. Huang,  
99        *Nano Lett.* **2017**, 17, 1995.
- 100   [19] A. Armin, R. D. Jansen-van Vuuren, N. Kopidakis, P. L. Burn, P. Meredith, *Nat. Commun.*  
101        **2015**, 6, 6343.
- 102   [20] Q. Lin, A. Armin, P. L. Burn, P. Meredith, *Nat. Photonics* **2015**, 9, 687.
